# Supplementary material for: A controllable interlayer shielding effect in twisted multilayer graphene quantum dots
Source: Royal Society of Chemistry journal article supplement (doi:10.1039/d4nr03330b), 2024-01-01
Supplement: d4nr03330b1.pdf [file d4nr03330b1.pdf]

## Controllable interlayer shielding effect in twisted multilayer graphene quantum dots

Xian Wang\*, Yunpeng Lu\*

School of Chemistry, Chemical Engineering and Biotechnology, Nanyang Technological University, Singapore 637371

### Contents

**Fig. S1** HOMO and LUMO in TMG<sub>72,2</sub> with an isovalue of 0.005 a.u. at  $\theta = 0^\circ$  (a),  $16^\circ$  (b) and  $58^\circ$  (c), respectively. Orbital overlap between the upper and lower layers is not found in the HOMO of the structure of  $\theta = 0^\circ$ , but found in the structures of  $\theta = 16^\circ$  and  $58^\circ$ .

**Fig. S2** Total density of states (TDOS) of TMG<sub>72,2</sub> of  $\theta = 0^\circ$ ,  $16^\circ$  and  $58^\circ$ .

**Fig. S3** Changes in dipole polarizability ( $\Delta\alpha_{zz}^P = \alpha_{zz}^P - \alpha_{zz}^0$ ) of layers in TMG<sub>72, N</sub> ( $N = 2-10$ ) versus twist angle by taking the polarizability component of monomer ( $\alpha_{zz}^0 = 143.8$  a.u.) as a reference.

**Fig. S4** The relationship between interlayer distance and rotational modes regarding  $\bar{\alpha}_{zz}$ . (a) Model I and (b) Model II.

**Fig. S5 (a)** The averaged axial polarizability of TMG<sub>36, N</sub> ( $N = 1-12$ ) and (b) TMG<sub>120, N</sub> ( $N = 1-6$ ) at a varying twist angle.

**Table S1** The absorption wavelength ( $\lambda$ , nm), and transition dipole moment ( $\mu_{ij}$ , a.u.) between the ground state and excited states corresponding to the first prominent peaks in absorption spectra of TMG<sub>72,2</sub> in Fig. 3.

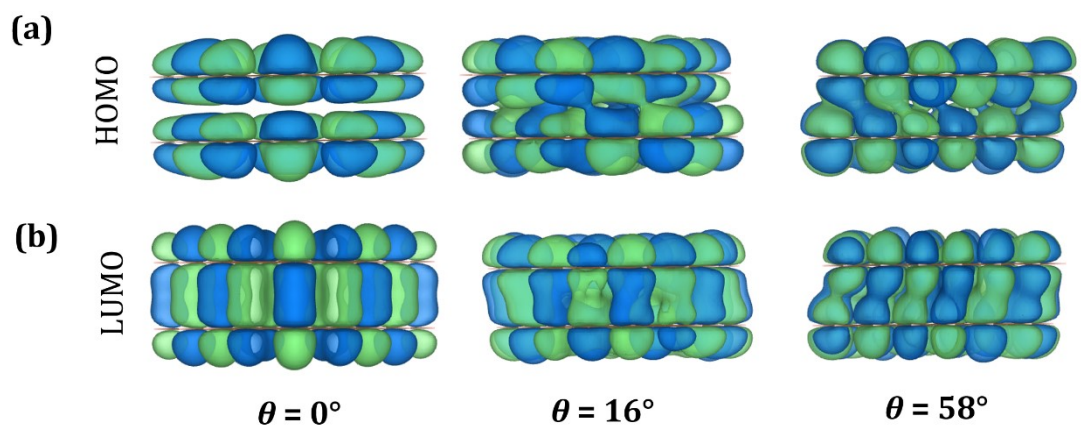

**Fig. S1** HOMO and LUMO in  $\text{TMG}_{72,2}$  with an isovalue of 0.005 a.u. at  $\theta = 0^\circ$  (a),  $16^\circ$  (b) and  $58^\circ$  (c), respectively. Orbital overlap between the upper and lower layers is not found in the HOMO of the structure of  $\theta = 0^\circ$ , but found in the structures of  $\theta = 16^\circ$  and  $58^\circ$ .

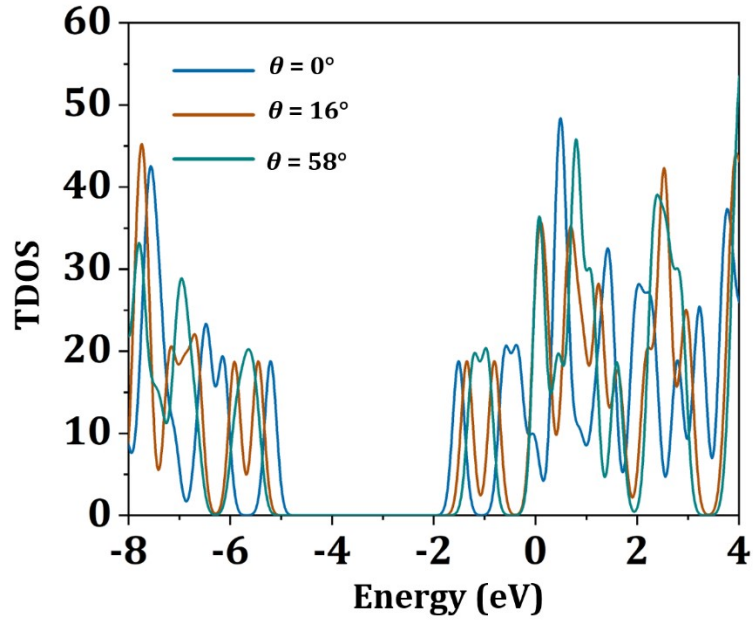

Fig. S2 Total density of states (TDOS) of  $\text{TMG}_{72,2}$  of  $\theta = 0^\circ, 16^\circ$  and  $58^\circ$ .

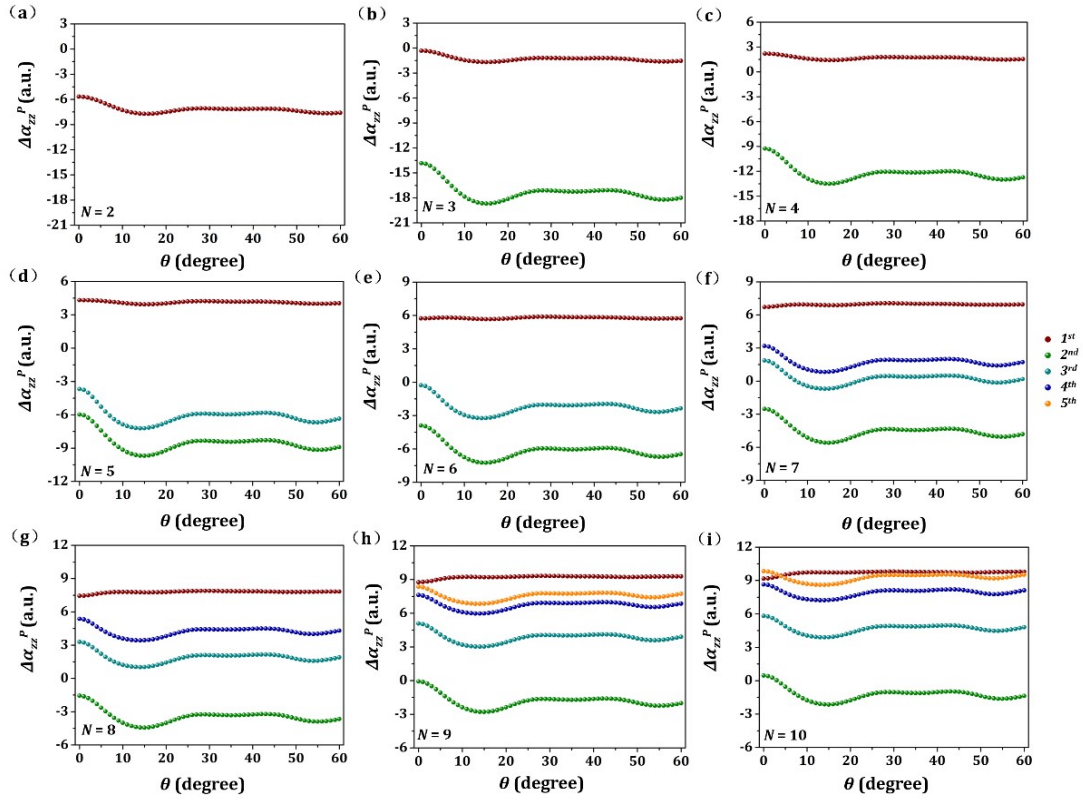

**Fig. S3** Changes in dipole polarizability ( $\Delta\alpha_{zz}^P = \alpha_{zz}^P - \alpha_{zz}^0$ ) of layers in  $\text{TMG}_{72,N}$  ( $N = 2-10$ ) versus twist angle by taking the polarizability component of monomer ( $\alpha_{zz}^0 = 143.8$  a.u.) as a reference.

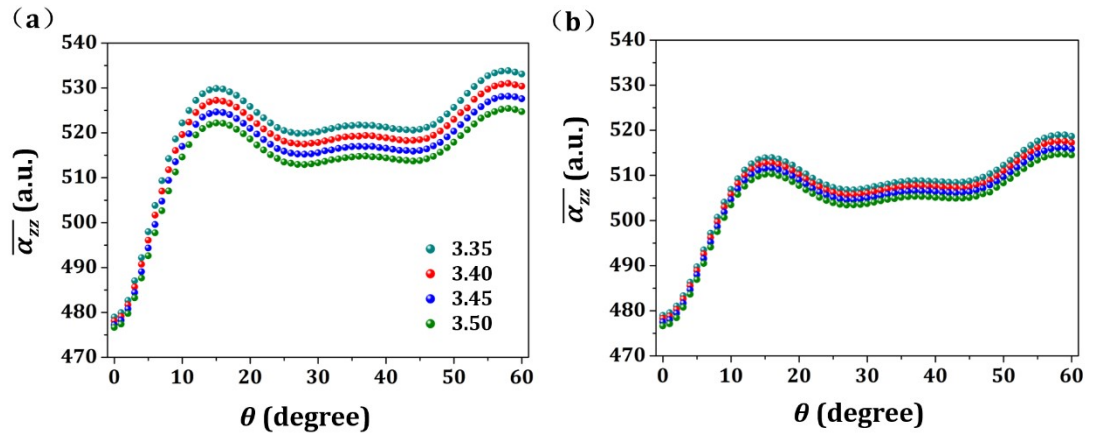

**Fig. S4** The relationship between interlayer distance and rotational modes regarding  $\bar{\alpha}_{zz}$ . (a) Model I and (b) Model II.

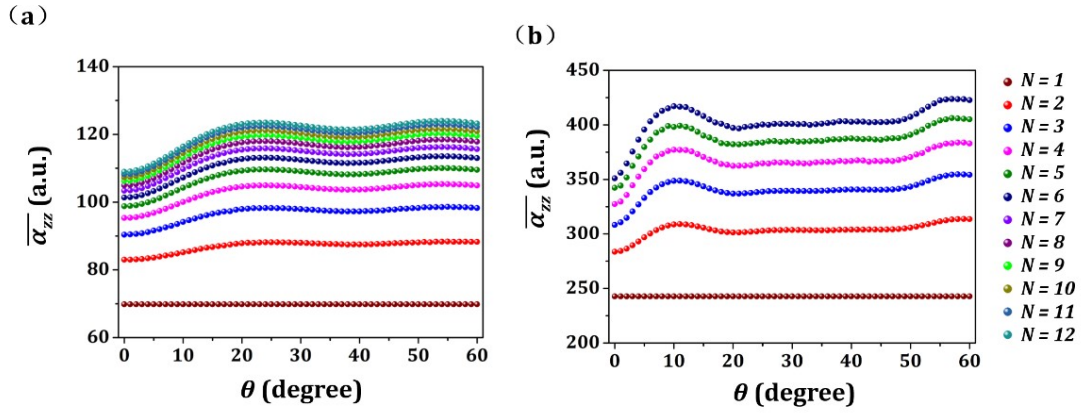

**Fig. S5** (a) The averaged axial polarizability of TMG<sub>36, N</sub> ( $N = 1-12$ ) and (b) TMG<sub>120, N</sub> ( $N = 1-6$ ) at a varying twist angle.

Table S1 The absorption wavelength ( $\lambda$ , nm), and transition dipole moment ( $\mu_{ij}$ , a.u.) between the ground state and excited states corresponding to the first prominent peaks in absorption spectra of TMG<sub>72,2</sub> in Fig. 3.

| $\theta$ | $\mu_{ij,x}$ | $\mu_{ij,y}$ | $\mu_{ij,z}$ | $\lambda$ | $ \mu_{ij} $ |
|----------|--------------|--------------|--------------|-----------|--------------|
| 0°       | -0.295       | -0.006       | 0.000        | 395       | 0.295        |
| 16°      | 0.000        | -0.830       | 0.000        | 480       | 0.830        |
| 58°      | -0.436       | 0.000        | 0.526        | 472       | 0.683        |
